# Supplementary material for: Effect of motional restriction on the unfolding properties of a cytochrome c featuring a His/Met–His/His ligation switch
Source: Royal Society of Chemistry journal article supplement (doi:10.1039/c3mt00311f), 2013-12-19
Supplement: c3mt00311f.pdf [file c3mt00311f.pdf]

## SUPPORTING INFORMATION

# Effect of motional restriction on the unfolding properties of a cytochrome *c* featuring a His/Met-His/His ligation switch

*Antonio Ranieri, Carlo Augusto Bortolotti, Gianantonio Battistuzzi, Marco Borsari, Licia Paltrinieri,*

*Giulia Di Rocco and Marco Sola*

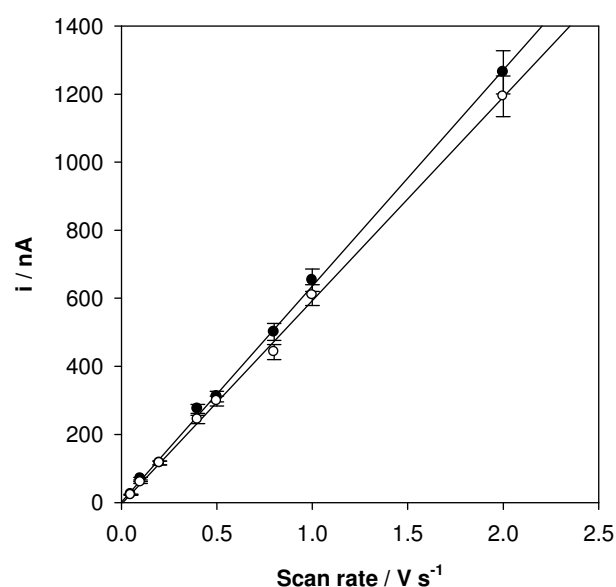

**Figure S1.** Cathodic current intensity as a function of the scan rate for the HP<sub>pH5</sub> (●) and LP<sub>pH5</sub> (○) signals for the K72A/K73H/K79A variant of yeast iso-1-cytochrome *c* adsorbed on polycrystalline gold electrode coated with a SAM of MUA/MU at pH 5 in the presence of 1M and 8M urea, respectively. Working solution contained 10 mM acetate buffer and 10 mM sodium perchlorate, pH 5. T = 20 °C.

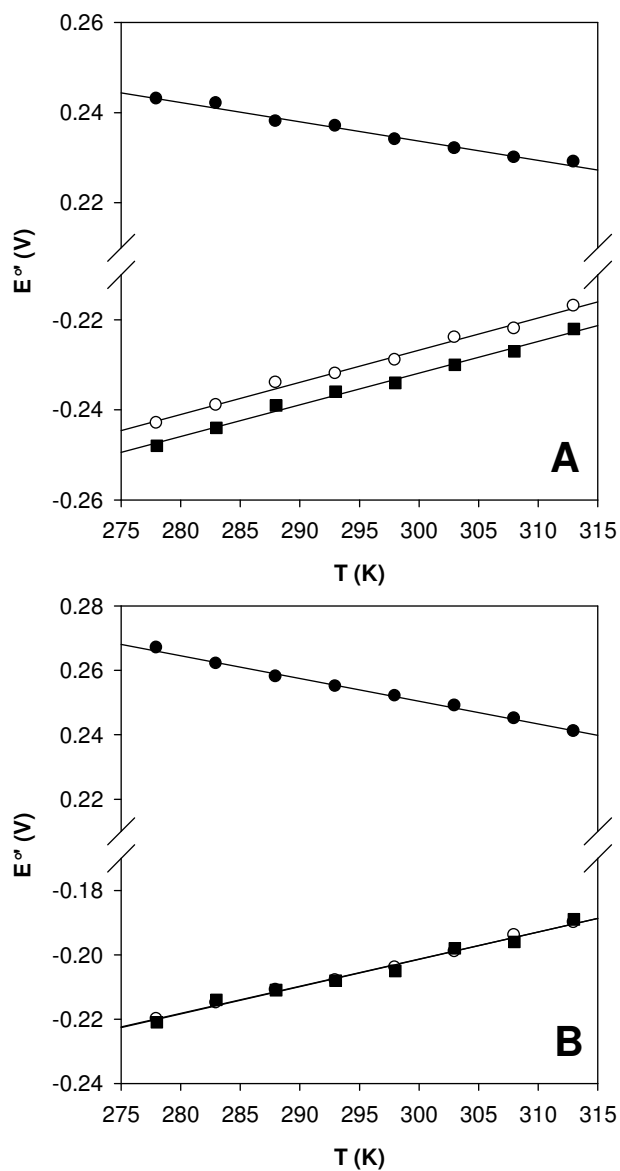

**Figure S2.** Typical plots of  $E^{\circ'}$  versus temperature for the CV signals of the K72A/K73H/K79A variant of yeast iso-1-cytochrome *c* adsorbed on polycrystalline gold electrode coated with a SAM of MUA/MU (A) and freely diffusing (B), at varying urea concentrations. HP<sub>pH5</sub>, 1M urea (●); LP<sub>pH5</sub>, 8 M urea (○), LP<sub>pH7.4</sub>, 8 M urea (■). Working solution: 10 mM phosphate (pH 7.4) or acetate (pH 5) buffer, plus 10 mM sodium perchlorate. Sweep rate: 0.05 V s<sup>-1</sup>, T = 20 °C.

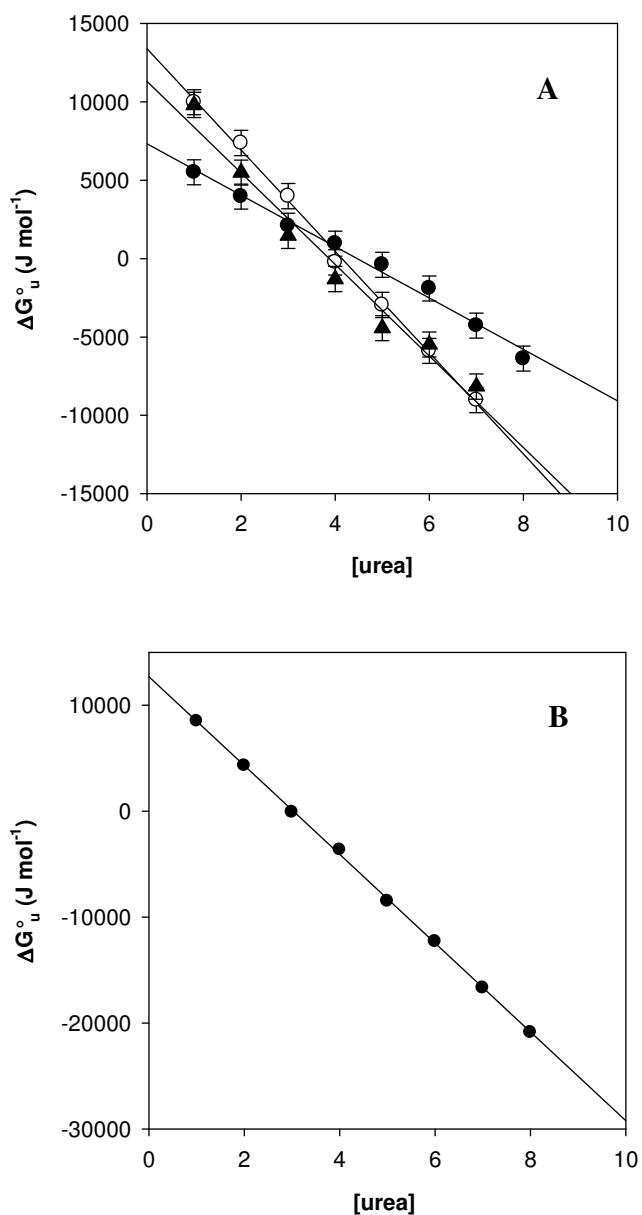

**Figure S3.** Plot of  $\Delta G_u^\circ$  versus [urea] for (A) wt (●), the K72A/K73H/K79A (○) and the K72A/K73A/K79A (▲) variants of yeast iso-1-cytochrome *c* adsorbed on polycrystalline gold electrode coated with a SAM of MUA/MU and (B) the K72A/K73H/K79A variant of yeast iso-1-cytochrome *c* under diffusing conditions.  $\Delta G_u^\circ$  was calculated from the current ratio of the signals corresponding to the His/His and His/Met axial heme ligation, according to eq. (3) and (4). Working solution: 10 mM acetate buffer and 10 mM sodium perchlorate at pH 5. Sweep rate:  $0.05 \text{ V s}^{-1}$ ,  $T = 5 \text{ }^\circ\text{C}$ . Solid lines are least-squares fits to the data points.

**Kinetics of His to Met axial ligand switching for the immobilized urea-unfolded reduced His/His form of the K72A/K73H/K79A variant of yeast iso-1 cytochrome c.** The kinetics of His to Met ligand switching for the reduced His/His form were determined from using the Laviron model for an electrochemical reaction followed by a first order chemical reaction (see ref. 78 main text), according to the scheme:

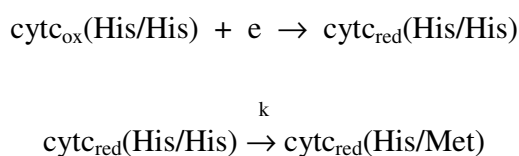

The  $i_a/i_c$  current ratio for the signal of the His-His form increases with increasing scan rate, as expected, because less time is allowed to the reduced protein to evolve toward the reduced His/Met form. In particular, the scan rates which correspond to  $i_a/i_c$  ratios of 0.25, 0.5 and 0.75 at  $E_i - E_{\text{pa}} = -0.4$  V (where  $E_i$  is the initial potential of the backward scan and  $E_{\text{pa}}$  is the anodic peak potential, see Laviron paper) have been determined. Using equation 23 and the working curves in Fig.7 of ref. 78, the following data were obtained at  $T=293\text{K}$ :

| $i_a/i_c$ | $l_e$  | $v_e/\text{Vs}^{-1}$ | $k/\text{s}^{-1}$ |
|-----------|--------|----------------------|-------------------|
| 0.25      | 0.0398 | 0.180                | 0.28              |
| 0.5       | 0.0218 | 0.330                | 0.29              |
| 0.75      | 0.0095 | 0.740                | 0.28              |
